# Supplementary material
Source: PubMed Central journal article supplement (PMC2346502)
Supplement: pmed.0050087.sd001.pdf [file pmed.0050087.sd001.pdf]

---

## Progreso en vacunación contra *Haemophilus influenzae* tipo b en las Américas

M. Carolina Danovaro-Holliday\*, Salvador Garcia, Ciro de Quadros, Gina Tambini, Jon K.

Andrus

### [Metadata]

**Financiamiento:** Los autores no recibieron ningún financiamiento específico de este artículo.

**Conflictos de interés:** Los autores han declarado que no existen conflictos de interés.

**Citación:** Danovaro-Holliday MC, Garcia S, de Quadros C, Tambini G, Andrus JK (2008)

Progress in vaccination against *Haemophilus influenzae* type b in the Americas. PLoS Med 5(4): e87. doi:10.1371/journal.pmed.0050087

**Derechos de reproducción:** © 2008 Danovaro-Holliday et al. Este es un artículo de acceso abierto distribuido según lo establecido en la Licencia de Atribución de Comunidad Creativa, que permite el uso, distribución y reproducción en cualquier medio sin restricción, a condición de que el autor y fuente original se acrediten.

**Abreviaciones:** DTaP, vacuna contra difteria-tétanos-tos ferina acelular; DTP, vacuna contra difteria-tétanos-tos ferina; DTP3, tercera dosis de vacuna DTP; PAI, Programa Ampliado de Inmunización; GAVI, Alianza Global de vacunas e inmunización; Hib, *Haemophilus influenzae* tipo b; Hib3, tercera dosis de vacuna contra Hib; LAC, Latinoamérica y el Caribe; OPS, Organización Panamericana de la Salud; FR, Fondo Rotatorio; SIREVA, Sistema Regional de Vacunas; GTA, Grupo Técnico Asesor sobre enfermedades prevenibles por vacunación de la OPS; OMS, Organización Mundial de la Salud.

M. Carolina Danovaro-Holliday, Salvador Garcia, and Jon K. Andrus pertenecen a la Unidad de

---

Inmunización de la Organización Panamericana de la Salud, Washington, D. C., Estados Unidos de América. Ciro de Quadros trabaja en el Albert B. Sabin Vaccine Institute, Washington, D. C., Estados Unidos de América. Gina Tambini pertenece al Área de Salud Familiar y Comunitaria de la Organización Panamericana de la Salud, Washington, D. C., Estados Unidos de América.

\* Para quien enviar correspondencia. E-mail: danovarc@paho.org

**[Begin text]**

**[COMP: Box for page 1, top of the middle column]**

### **Puntos de Resumen**

- La introducción de vacunas contra el Hib en los países de América Latina y el Caribe ha reducido sustancialmente la morbilidad y la mortalidad debida a las infecciones invasoras causadas por Hib.
- Todos los países de América Latina y el Caribe excepto uno incluyen la vacuna contra el Hib en su esquema regular de vacunación para lactantes.
- Los factores que han favorecido la adopción de vacunas contra el Hib a nivel regional incluyen una sólida voluntad política , datos que apoyan la carga de la enfermedad causada por Hib y el impacto en países que adoptaron tempranamente la vacuna y el intercambio de experiencias entre países.
- La consideración de la sostenibilidad financiera al introducir la más costosa vacuna contra el Hib fue fundamental para asegurar la exitosa introducción de ésta en todos los países.
- Todavía se necesitan esfuerzos para mejorar las coberturas de vacunación y fortalecer la vigilancia de enfermedades bacterianas invasoras en países en vías de

---

desarrollo.

## **Introducción**

A nivel mundial, el *Haemophilus influenzae* tipo b (Hib) es responsable de al menos 3 millones de casos de enfermedad grave cada año. Aproximadamente 400.000 niños fallecen anualmente debido a neumonía o meningitis causadas por Hib [1]. Secuelas neurológicas graves ocurren en 15% a 30% de aquellos que sobreviven una meningitis por Hib [2]. Otras manifestaciones menos frecuentes de Hib son la epiglottitis, artritis séptica, osteomielitis y sepsis [1–3].

Las actuales vacunas conjugadas de polisacáridos con proteínas contra el Hib son sumamente eficaces y seguras. Las series primarias de dos o tres dosis protegen a aproximadamente 95% de los lactantes [4–8]. La vacunación universal contra Hib ha resultado en reducciones dramáticas de la enfermedad invasora por Hib [9–13] a través de protección directa de la vacuna y un importante efecto de rebaño relacionado con la reducción de la portación nasofaríngea de Hib en la comunidad [12,14–16]. Los eventos adversos a la vacuna son poco frecuentes y la vacuna contra Hib sólo está contraindicada para personas con hipersensibilidad a alguno de sus componentes [8,17].

La Organización Mundial de la Salud (OMS) recomienda el uso de la vacuna contra el Hib en todo el mundo [1]. Más aún, Alianza Global de vacunas e inmunización (GAVI)— una organización que alinea recursos públicos y privados en una iniciativa mundial para proveer mayor acceso a los beneficios de la inmunización—considera la introducción de vacunas contra Hib en los países más pobres del mundo como una máxima prioridad [18].

Antes de la introducción de la vacuna, se estimaba que unos 20.000 casos de meningitis

---

por Hib ocurrían en países Latinoamérica y el Caribe (LAC) anualmente, basado en una incidencia general de meningitis por Hib de 35 por 100.000 niños de 0 a 4 años de edad [19]. Otros 20.000 casos de enfermedad invasora por Hib anuales se habían calculado para los Estados Unidos [20]. La mayoría de los casos ocurrían en niños de menos de 24 meses de edad, con al menos 60% de los casos en niños de 0 a 11 meses en la mitad de los estudios. La mortalidad anual por meningitis por Hib en niños menores de cinco años se ha estimado en dos por 100.000 en el hemisferio Occidental [21].

En este artículo, examinamos el progreso de la introducción de la vacuna, las lecciones aprendidas y los desafíos restantes con respecto a la vacunación contra Hib en las Américas, haciendo hincapié en los países de LAC. Esperamos que esta información actualizada y resumida sobre la vacunación contra Hib sirva de referencia útil a los funcionarios de salud pública y las instancias normativas de otras regiones que afronten el reto de introducir la vacuna contra Hib y otras vacunas nuevas o subutilizadas.

## **Métodos**

Para evaluar el progreso realizado por los países de LAC en materia de vacunación contra Hib y los restantes desafíos, revisamos las recomendaciones del Grupo Técnico Asesor sobre enfermedades prevenibles por vacunación de la Organización Panamericana de la Salud (GTA); los reportes de inmunización anuales que los países entregan a la OPS; los registros de compra de vacuna contra Hib del Fondo Rotatorio de la OPS y los datos de aislamiento de Hib de los países seleccionados que participan en una Red de Laboratorios Regional para la Vigilancia de Meningitis y Neumonía Bacterianas (Sistema Regional de Vacunas o SIREVA). Revisamos los datos desde 1997 a 2006.

La OPS es un organismo internacional de salud pública con más de 100 años de experiencia

---

en trabajar para mejorar la salud y los niveles de vida de los países de las Américas. La OPS sirve como la Oficina Regional de la OMS para la Región de las Américas y proporciona asistencia técnica a todos los países y territorios en el continente americano. Sin embargo, la mayoría de la cooperación técnica de la OPS se proyecta a los países más pobres de LAC [22]. El GTA de la OPS está compuesto de ocho expertos en inmunización y vacunas que se reúnen de manera bianual, en presencia de representantes de inmunización de los Estados Miembros, para proporcionar recomendaciones sobre políticas y estrategias de vacunación para mejorar los esfuerzos en materia de vacunación de los países [22].

Desde los años 1980, los Estados Miembros envían informes anuales de inmunización a la OPS, usando un formulario estandarizado, el Formulario para la Notificación Conjunta de OPS-OMS/UNICEF (anteriormente conocido como tablas del PAI). Este formulario incluye datos sobre:

- todas las vacunas incluidas en los esquemas regulares de vacunación de los países;
- presentación de las vacunas;
- niveles de coberturas administrativas anuales (para la vacuna contra Hib, es el número de terceras dosis de vacuna contra Hib administradas dividido por el número de niños de menos de un año de edad);
- datos de vigilancia epidemiológica (número de casos de meningitis por Hib);
- indicadores sobre el financiamiento de inmunización, tales como el porcentaje de todos los gastos en vacuna que se cubren con fondos del gobierno (excluyendo financiamiento externo de donantes, pero en algunos casos incluyendo créditos);
- existencia de una línea presupuestaria para compra de vacunas; y

- 
- existencia de legislación relativa a inmunización.

El Fondo Rotatorio (FR) es un mecanismo para la compra a granel de vacunas e insumos para inmunización, que es administrado por la OPS desde 1979 para atender a sus Estados Miembros. La OPS anualmente consolida solicitudes de vacunas de los países que desean participar y lleva a cabo una licitación internacional abierta a todos los fabricantes de vacunas. La OPS compra vacunas con dinero del FR, y los países reembolsan al FR por compras hechas a su nombre [23,24].

El SIREVA comenzó en 1993 para vigilar la distribución de los serotipos neumocócicos que causan enfermedad grave y los perfiles de resistencia a los antimicrobianos de los neumococos en seis países. Posteriormente, SIREVA amplió su mandato para llevar a cabo la vigilancia de laboratorio para otros agentes que causan meningitis y neumonía, como Hib y meningococo.

### **Recomendaciones de la OPS sobre inmunización contra Hib**

Para el control de las enfermedades invasivas causadas por Hib y para reducir los portadores de Hib en las Américas, el GTA de la OPS recomienda desde 1997 que sus Estados Miembros:

- introduzcan la vacunación contra Hib en sus esquemas universales de vacunación infantil;
- establezcan mecanismos sostenibles de financiamiento para mantener la vacunación contra Hib; y
- monitoreen y reporten sus coberturas de vacunación contra Hib y los casos de enfermedades por Hib para evaluar el impacto de la intervención.

---

Para ayudar a asegurar la sostenibilidad de la vacunación contra Hib, el GTA también ha recomendado la compra de la vacuna contra el Hib en combinación con la vacuna contra difteria-tétanos-tos ferina (DTP) o DTP/Hepatitis B a través del FR, pues esto puede resultar en un significativo ahorro.

### **Progreso en la introducción de vacunas contra el Hib**

Para fines del año 2006, todos los países de las Américas con la excepción de Haití, habían incluido la vacuna contra Hib en su esquema de vacunación infantil (Cuadro 1). Como resultado, más del 98% de los 16 millones de niños que nacen en las Américas viven en países que utilizan la vacuna contra Hib. Canadá (1986) y los Estados Unidos de América (1991) fueron de los primeros países en introducir la vacunación contra Hib. Bermuda (1989), las Islas Caimán (1992), y los territorios Holandeses (1995) fueron los primeros en el Caribe. Uruguay y Chile siguieron en 1994 y 1996, respectivamente. Uruguay realizó una captación agresiva de la vacuna contra Hib en niños de uno a cuatro años de edad, mientras que Chile comenzó vacunando una cohorte de nacimientos a la vez [11,25]. Argentina siguió en 1997. Sin embargo, la mayor parte de los países y territorios ( $n = 20$ ) introdujeron la vacuna contra Hib entre 1998 y 2000, más de diez años después de que ésta fuera autorizada en 1987. Dominica fue el último país en introducir la vacuna contra Hib en 2006.

La mayoría de los países incluyen sólo tres dosis para niños menores de un año. Sin embargo, Canadá, los Departamentos Franceses y los territorios holandeses en el Caribe, los Estados Unidos y ocho países de LAC incluyen una dosis del refuerzo durante el segundo año de vida (Cuadro 1).

En la mayoría de los países, la vacunación contra Hib se introdujo a nivel nacional.

---

Debido principalmente a los recursos limitados, países como Brasil, Guatemala y Perú comenzaron a vacunar en poblaciones seleccionadas o por zonas geográficas. El uso de vacuna contra el Hib en el sector privado en la región, en algunos casos varios años antes de su introducción en el programa regular de vacunación, ha sido generalizado, pero no se ha cuantificado [11].

### **Lecciones Aprendidas**

**Logística.** Una de las lecciones aprendidas con la introducción de vacunas contra Hib en las Américas es que la selección de una formulación de vacuna (combinación frente a monovalente) y presentación (viales de una versus 10 dosis) es esencial. Esto tiene una repercusión sobre el precio, porcentaje de desperdicio de vacuna, espacio en la cadena de frío, necesidad de reconstitución y actividades de capacitación para los trabajadores de salud [11,25,26].

En la actualidad 34 países usan la vacuna contra Hib como una combinación DTP-Hib-Hepatitis B o pentavalente (sólo disponible en viales de una dosis) (Cuadro 1). De 17 países y territorios que comenzaron a usar la vacuna contra Hib monovalente, sólo Canadá y los Estados Unidos no han cambiado a una vacuna combinada, aunque en ambos países, las combinaciones de Hib a menudo están disponibles como una opción.

La vacuna contra Hib en una formulación combinada ofrece varias ventajas. Las vacunas combinadas reducen el número de inyecciones, de este modo reducen el riesgo de complicaciones y eventos adversos por inyección y reducen las oportunidades perdidas de vacunación. Adicionalmente, los padres y los trabajadores de salud muestran una mayor aceptación de las combinaciones de vacunas [27,28]. Las vacunas combinadas contra Hib tienden a ser menos costosas que la vacuna contra Hib monovalente, contribuyendo por lo tanto



---

a la sostenibilidad de los programas de vacunación [27,28–30].

**Financiamiento de la vacunación contra Hib.** A pesar de que la vacunación universal contra Hib es altamente costo beneficiosa en ambos, los países desarrollados y aquellos en vías de desarrollo [31–33], el precio de la vacuna contra Hib es más alto que el de las vacunas tradicionales del Programa Ampliado de Inmunización (PAI). El precio de la vacuna contra Hib es más del doble del precio de la vacuna contra sarampión-rubéola-parotiditis, la vacuna más cara entre las vacunas del PAI (US\$3,15 versus US\$1,4 por dosis). Por este motivo la sostenibilidad financiera ha sido una consideración fundamental para los países que han introducido la vacuna contra Hib en su esquema regular de vacunación. Para asegurar la sostenibilidad, la OPS recomienda la compra de la vacuna contra Hib en combinación con DTP o DTP/Hepatitis B a través del FR y promueve que los países legislen para asegurar una partida presupuestaria para vacuna y otros gastos del programa de vacunación.

En 2006, todos los países de LAC usando la vacuna contra Hib, con la excepción de tres (Bolivia, Nicaragua y la República Dominicana), financiaban más del 95% de sus gastos en vacunas para el sector público usando fondos del gobierno. Además, en la mayoría de los países de LAC (27 de 31 con datos disponibles) al menos el 90% de los costos recurrentes del PAI se financiaban con fondos gubernamentales. Todos los países de LAC que usan la vacuna contra Hib han reportado que disponen una línea presupuestaria para compra de vacunas (en la República Dominicana, Jamaica y Saint Kitts y Nevis se incluyen las vacunas en una línea para compra de medicamentos).

De los seis países de LAC elegibles para apoyo de fondos GAVI (países con un producto nacional bruto de menos de US\$1.000 *per capita*), Guyana ha sido el único que introdujo la vacuna contra Hib (como pentavalente) usando apoyo de GAVI. En 2006, Guyana se hizo cargo

---

del complete financiamiento de esta vacuna. Otros países de bajos recursos han introducido la vacuna pentavalente con apoyo de otras agencias de ayuda.

Al año 2006, 26 países de LAC habían reportado contar con algún tipo de legislación sobre inmunización, y otros tres se encontraban en el proceso de adopción de ese tipo de legislación. En aquellos países con legislación, las leyes y los decretos han servido como una manera de asegurar una línea presupuestaria para las vacunas y para sostener la introducción de vacunas [34]. Entre los primeros países en adoptar la vacunación contra Hib, su introducción fue posterior a la emisión de decretos ministeriales y presidenciales en Chile y Uruguay [25]. No se dispone de información respecto a la relación específica entre la introducción de la vacuna contra Hib y legislación en otros países.

El mantener precios asequibles es crucial para la introducción de vacunas. El precio para la vacuna contra Hib en un comienzo fue de entre US\$6 y US\$8,2 por dosis en 1997 y bajó marcadamente a entre US\$2,18 y US\$2,60 a fines de 1998, al tiempo que significativamente más dosis se compraron. Para 2007, el precio del FR es de US\$3,15 por dosis para la combinación DTP-Hib (viales de diez dosis) y US\$3,92 por dosis de pentavalente (viales de una dosis).

En 2006, todos los países de LAC a excepción de cuatro compraron sus vacunas contra Hib a través del FR: dos países usaron vacunas producidas a nivel nacional (Brasil y Cuba) y dos compraron directamente del proveedor.

**Red regional de laboratorio.** La existencia de una red regional de laboratorio ha sido instrumental en el monitoreo de las cepas de Hib circulantes que causan meningitis y neumonías. Para 2006, SIREVA incluía laboratorios de 19 países latinoamericanos más el Centro de Epidemiología del Caribe (CAREC) y continuaba monitoreando las tendencias en cuanto a serotipos circulantes y patrones de resistencia antimicrobiana del Hib, así como de

---

pneumococcus y meningococcus [35].

### **Desafíos restantes**

**Coberturas de vacunación contra Hib.** La OPS recomienda lograr niveles de cobertura de al menos 95% para todas las vacunas en todos los municipios [36,37]. Durante los siete años previos, el nivel reportado de cobertura administrativa (promedio ponderado) con tres dosis de vacuna contra Hib (Hib3) en LAC ha aumentado de 78% en el año 2000 a 94% en 2006 (con 19 y 37 países reportando, respectivamente). Sin embargo, el nivel de cobertura más bajo reportado en los primeros años más bien es un reflejo del uso parcial de la vacuna contra Hib el año de su introducción. Los niveles de cobertura con Hib3 son comparables a los niveles de cobertura con tercera dosis de vacuna contra difteria-tétanos-tos ferina (DTP3). El uso de vacunas combinadas contribuye a este hallazgo. Con los datos disponibles de cobertura, no se observa deterioración alguna de la cobertura con DTP3 durante el año en que la vacuna contra Hib es introducida.

Los niveles de cobertura varían entre países y dentro de ellos. En 2006, las coberturas reportadas variaron entre 83% a más de 100%. Además, 42% de los municipios (distritos) de LAC reportaron niveles de cobertura menores de 95% para DTP3, un trazador para la cobertura con Hib3. Este hallazgo ilustra las inequidades que aún existen en el uso de la vacuna contra Hib en países de LAC.

**Sostenibilidad de los programas de inmunización.** Un gran desafío para los países de las Américas es mantener la vacunación contra Hib al mismo tiempo que se adicionan nuevas y más costosas vacunas a los esquemas regulares de inmunización. La OPS se encuentra desarrollando un marco de políticas regional para apoyar a los países en las siguientes áreas: explorando mecanismos para encontrar nuevas estrategias para un financiamiento sustentable,

---

enfocado en asegurar financiamiento a largo plazo para los programas de inmunización, particularmente a través de la creación de espacio fiscal; fortaleciendo la legislación en vacunas para reducir costos de transacción a nivel nacional y mejorando la eficiencia del FR y expandiendo la participación en sus servicios para que así los países puedan pagar por vacunas de nueva generación [34,37–39].

“Creación de espacio fiscal” es una expresión que se refiere a la movilización de recursos adicionales sin comprometer las prioridades en salud existentes. Entre los mecanismos utilizados se incluyen: la identificación de nuevos aliados estratégicos; el fortalecimiento de los procedimientos para recolección de impuestos; la generación de nuevas fuentes de ingreso a través de loterías nacionales, como se ha hecho en Costa Rica para la compra de vacunas y exenciones de impuestos de importación para vacunas, ya que este tipo de impuestos puede aumentar el costo de compra de vacunas en hasta un 30% en algunos países.

La OPS reciente mente describió un modelo de legislación en vacunas basado en un análisis de la legislación existente [34]. Algunos de los componentes de legislación que procuran asegurar los recursos para los programas de vacunación incluyen: una partida presupuestaria para compra de vacunas; reglamentos que garanticen el desembolso oportuno y fiable de los recursos; exenciones tributarias para las vacunas e insumos de inmunización; flexibilidad para firmar contratos con proveedores, incluidos terceros como el RF y reglamentos simplificados de aduana para acelerar el proceso de importación y reducir los costos de transacción.

**Impacto de la vacunación.** El impacto de la vacunación contra Hib ha sido bien documentado por algunos países de las Américas por la reducción de casos de meningitis por Hib [9–11,25,40]. Sin embargo, algunos países no cuentan con vigilancia de enfermedades bacterianas invasoras con el desempeño suficiente para documentar ese impacto.

---

Una disminución en meningitis por Hib ha sido bien documentada en Chile, Colombia y Uruguay, a pesar de diferencias en sus estrategias de introducción y los niveles de cobertura alcanzados (Figura 1). Ambos, Uruguay y Chile alcanzaron niveles de cobertura de más de 90% desde la introducción de la vacuna, pero solamente Uruguay realizó una estrategia agresiva de captura de niños de más de un año al introducir la vacuna. El esquema de vacunación en Uruguay incluye una dosis de refuerzo a los 12 meses de edad. En un inicio Colombia logró niveles moderados de cobertura (50%–65%) que luego aumentaron a más de 86% en los últimos tres años. Basándose en los niveles de cobertura obtenidos, un nivel de efectividad de la vacuna de 95% y los 20.000 casos estimados antes del uso masivo de la vacuna [19], la OPS ha estimado que los casos de meningitis por Hib en LAC han disminuido en aproximadamente 85%.

En años recientes, el número de aislamientos de Hib en niños menores de dos años ha disminuido en países seleccionados, de 92 en el año 2000 a 30 en 2005 en Brasil, de 30 en 2000 a ocho en 2005 en Colombia, de 53 en 2000 a cuatro en 2005 en la República Dominicana y de 44 en 2000 a dos en 2005 en Venezuela. En estos cuatro países el número de aislamientos de pneumococci y meningococci se ha mantenido estable para el mismo periodo de tiempo [35]. Hib continua siendo aislado de países que usan la vacuna. Sin embargo, ni SIREVA ni la OPS regularmente colectan datos sobre el estado vacunal de los casos de Hib notificados.

Sólo unos pocos países de LAC han podido demostrar que la vacuna contra el Hib ha sido eficaz contra la neumonía en los niños de menos de dos años de edad. La vacuna contra Hib ha reducido la incidencia de hospitalizaciones por neumonías por Hib en casi un 20% en Chile [41,42]. Para neumonías diagnosticadas radiológicamente, la efectividad de la vacuna ha sido estimada en 31% en la parte central de Brasil y hasta en un 55% en un estudio de casos y controles realizado en Colombia [43,44].

---

La vigilancia de Hib sigue siendo uno de los retos más importantes en LAC. Para promover el fortalecimiento de vigilancia rutinaria, la OPS recomienda la integración de Hib en la vigilancia rutinaria de meningitis y neumonías bacterianas [3]. Como se ha hecho en Centro América, esto requerirá de la adaptación del protocolo genérico de la OMS para vigilancia de Hib con base poblacional [3,45,46]. En la actualidad las definiciones de casos y los procedimientos de vigilancia epidemiológica varían de un país a otro limitando la comparabilidad de los datos.

El monitoreo de la efectividad de la vacuna contra Hib en el programa regular de inmunización es muy importante ya que la eficacia de la vacuna puede verse afectada por varios factores, tales como el uso de dosis de refuerzo, el descenso de la inmunidad, reducción de los refuerzos naturales debido a la reducción en la transmisión de Hib [47] daños de la vacuna por frío en unidades de almacenamiento no mantenidas de manera apropiada. El monitoreo de la cambiante epidemiología de la enfermedad por *Haemophilus influenzae* en la era posvacuna también será importante, ya que el papel de *Haemophilus influenzae* invasivos de tipo no b puede hacerse prominente [48]. La relevancia del continuo monitoreo de la enfermedad por Hib ha sido recientemente puesto de relieve. En el reino Unido, un inesperado aumento en la incidencia de enfermedad por Hib coincidió con la distribución de vacunas combinadas con pertussis acelular (vacunas contra difteria-tétanos- tos ferina acelular o DTaP-Hib) [49–52]. En la Gambia, Hib parece haber reemergido en 2005-2006 luego de al menos tres años sin casos [53].

El valor agregado de usar dosis de refuerzo ha sido extensamente debatido dado que, en países en vías de desarrollo, la mayor parte de la carga de la enfermedad por Hib ocurre antes de la edad en que las dosis de refuerzo son recomendadas (12–18 meses) [1]. La OPS se encuentra

---

en la actualidad apoyando a cuatro países para determinar la utilidad de una dosis de refuerzo en el Segundo año de vida.

Esfuerzos están siendo implementados para expandir el trabajo realizado por el SIREVA, incluyendo el recoger más datos clínicos y epidemiológicos. Esta nueva iniciativa, conocida como *Sistema de Vigilancia de Redes para las Bacterias Causantes de Neumonía y Meningitis* o SIREVA II, deberá proporcionar una mejor comprensión de la aparición de casos en países reportando altas cobertura con vacuna contra Hib y la posibilidad de reemplazo de serotipos con el transcurso del tiempo.

## **Conclusiones**

Aunque los países de LAC estuvieron a la zaga de América del Norte en sus esfuerzos por introducir la vacuna contra el Hib en sus esquemas de vacunación infantil, probablemente debido principalmente a consideraciones financieras, para fines del año 2006, todos los países menos Haití habían introducido esta vacuna. Aunque los datos de Hib disponibles no son completos y proceden de la notificación rutinaria por parte de los países a la OPS, creemos que los principales factores que favorecieron la adopción a nivel regional de la vacuna contra Hib en LAC son la seguridad y la eficacia de las vacunas conjugadas contra Hib; la sólida voluntad política; la existencia de datos apoyando la existencia de una carga de enfermedad causada por Hib y el significativo impacto de la vacunación en los primeros países que adoptaron la vacuna y sus lecciones aprendidas, compartidas a través de varias publicaciones y reuniones regionales, y los esfuerzos de la OPS para asegurar la asequibilidad de las vacunas contra Hib, principalmente a través del FR.

El intentar usar la vacuna contra Hib en combinación con otros antígenos y el considerar

---

mecanismos para asegurar la sostenibilidad de su uso, como leyes de vacuna o decretos presidenciales siempre que sea posible, acelerará la introducción. Los principales desafíos que aún enfrentan los países de LAC son abordar las bajas coberturas de vacunación en los distritos con bajo desempeño, asegurar la vacunación contra Hib al introducir otras nuevas vacunas más costosas y establecer o fortalecer la vigilancia de Hib, haciendo mejor uso de la red de laboratorios ya bien establecida. Al considerar la introducción de otras nuevas vacunas, los países de LAC deben tener en cuenta las lecciones aprendidas con la introducción de la vacuna contra Hib, para así acortar el tiempo entre el desarrollo de vacunas y su adopción generalizada por los países en vías de desarrollo.

### **Agradecimientos**

Los autores desean agradecer a la Sra. Carmelita Lucia Pacis por la preparación de los datos para el análisis, a la Sra. Rebecca Reingold por ayudar a escribir el manuscrito, al Sr. Alan Crouch para sus observaciones fundamentales y a la Sra. Beatrice Carpano y Srta. Lara Markovitz para su asistencia editorial. Los autores también desean agradecer a los programas de vacunación de Chile, Colombia, Uruguay, y el resto de los países de las Américas por compartir sus datos de Hib. Gracias a todos los laboratorios que participan en la red SIREVA, coordinada por el Instituto Adolfo Lutz en São Paulo, Brasil y el Instituto Nacional de Salud de Bogotá, Colombia, y financiada por la Agencia Canadiense para el Desarrollo Internacional, por proporcionar los datos con respecto a los aislamientos bacterianos. La dedicación inquebrantable de los oficiales del programa de cada país y los trabajadores de salud que prestan servicios de inmunización a los pueblos de las Américas merece el más alto reconocimiento.



---

## Supporting Information

### File S1.

Translation of the article into Spanish

### Referencias

1. World Health Organization (2006) WHO Position Paper on *Haemophilus influenzae* type b conjugate vaccines. Wkly Epidemiol Rec 81: 445-452.
2. Wenger JD, Ward JI (2004) *Haemophilus influenzae* vaccine. In: Plotkin SA, Orenstein WA, editors. Vaccines, 4th edition. Philadelphia: W.B. Saunders Co. pp. 229-268.
3. Organización Panamericana de la salud (2005) Control de la difteria, el tétanos, la tos ferina, las infecciones por *Haemophilus influenzae* tipo b y la hepatitis B. Guía práctica. Disponible: [http://www.paho.org/spanish/ad/fch/im/GuiaPractica\\_Pentavalente.pdf](http://www.paho.org/spanish/ad/fch/im/GuiaPractica_Pentavalente.pdf). Visitado 24 de marzo de 2008.
4. Eskola J, Peltola H, Takala AK, Kayhty H, Hakulinen M, et al (1987) Efficacy of *Haemophilus influenzae* type b polysaccharide-diphtheria toxoid conjugate vaccine in infancy. N Engl J Med. 317: 717-722.
5. Booy R, Moxon ER, MacFarlane JA, Mayon-White RT, Slack MP (1992) Efficacy of *Haemophilus influenzae* type B conjugate vaccine in Oxford region. Lancet. 340: 847.
6. Vadheim CM, Greenberg DP, Partridge S, Jing J, Ward JI (1993) Effectiveness and safety of an *Haemophilus influenzae* type b conjugate vaccine (PRP-T) in young infants. Kaiser-UCLA Vaccine Study Group. Pediatrics 92: 272-279.
7. Mulholland K, Hilton S, Adegbola R, Usen S, Oparaugo A, et al. (1997) Randomised trial of *Haemophilus influenzae* type-b tetanus protein conjugate vaccine [corrected] for prevention

- 
- of pneumonia and meningitis in Gambian infants. *Lancet* 349: 1191-1197. Erratum in: *Lancet* 1997;350(9076):524.
8. Swingler G, Fransman D, Hussey G (2003) Conjugate vaccines for preventing *Haemophilus influenzae* type b infections. *Cochrane Database Syst Rev*: CD001729.
  9. Murphy TV, White KE, Pastor P, Gabriel L, Medley F, et al. (1993) Declining incidence of *Haemophilus influenzae* type b disease since introduction of vaccination. *JAMA*. 269: 246-248.
  10. Organización Panamericana de la Salud (1996) Impacto de la introducción de la vacuna contra *Haemophilus influenzae* tipo b (Hib) en Uruguay. *Boletín Informativo del PAI*. 18: 6.
  11. Wenger JD, DiFabio J, Landaverde JM, Levine OS, Gaafar T (1999) Introduction of Hib conjugate vaccines in the non-industrialized world: experience in four 'newly adopting' countries. *Vaccine* 18: 736-742.
  12. Heath PT, McVernon J (2002) The UK Hib vaccine experience. *Arch Dis Child* 86: 396-399.
  13. Adegbola RA, Secka O, Lahai G, Lloyd-Evans N, Njie A, et al. (2005) Elimination of *Haemophilus influenzae* type b (Hib) disease from The Gambia after the introduction of routine immunisation with a Hib conjugate vaccine: a prospective study. *Lancet* 366: 144-150.
  14. Takala AK, Eskola J, Leinonen M, Kayhty H, Nissinen A, et al. (1991) Reduction of oropharyngeal carriage of *Haemophilus influenzae* type b (Hib) in children immunized with an Hib conjugate vaccine. *J Infect Dis* 164: 982-986.
  15. Murphy TV, Pastor P, Medley F, Osterholm MT, Granoff DM (1993) Decreased *Haemophilus* colonization in children vaccinated with *Haemophilus influenzae* type b conjugate vaccine. *J Pediatr* 122: 517-523.

- 
16. Hviid A, Melbye M (2004) Impact of routine vaccination with a conjugate *Haemophilus influenzae* type b vaccine. *Vaccine* 22: 378-382.
  17. World Health Organization (2008) *Haemophilus influenzae* type b vaccine. Available: <http://www.who.int/immunization/topics/hib/en/index.html>. Accessed 6 March 2008.
  18. The Hib Initiative (2008) About the Hib Initiative: Vision. Available: <http://www.hibaction.org/abouthibinitiative.php#vision>. Accessed 6 March 2008.
  19. Peltola H (1997) *Haemophilus influenzae* type b disease and vaccination in Latin America and the Caribbean. *Pediatr Infect Dis J* 16: 780-787.
  20. Cochi SL, O'Mara D, Preblud SR (1988) Progress in *Haemophilus* type b polysaccharide vaccine use in the United States. *Pediatrics* 81: 166-168.
  21. World Health Organization (2002) *Haemophilus influenzae* type b (Hib) meningitis in the pre-vaccine era: A global review of incidence, age distributions, and case-fatality rates. Available: [http://www.who.int/immunization/documents/WHO\\_VB\\_02.18/en/index.html](http://www.who.int/immunization/documents/WHO_VB_02.18/en/index.html). Accessed 6 March 2008.
  22. Tambini G, Andrus JK, Fitzsimmons JW, Roses Periago M (2006) Regional immunization programs as a model for strengthening cooperation among nations. *Rev Panam Salud Publica* 20: 54-59.
  23. DeRoeck D, Bawazir SA, Carrasco P, Kaddar M, Brooks A, et al. (2006) Regional group purchasing of vaccines: Review of the Pan American Health Organization EPI revolving fund and the Gulf Cooperation Council group purchasing program. *Int J Health Plann Manage* 21: 23-43.
  24. World Health Organization (1983) EPI in the Americas: benefits from the Revolving Fund. *WHO Chronicle* 37: 81-85.

- 
25. Landaverde M, Di Fabio JL, Ruocco G, Leal I, de Quadros C (1999) Introduction of a conjugate vaccine against Hib in Chile and Uruguay. *Rev Panam Salud Publica* 5: 200-206.
  26. Organización Panamericana de la Salud (2004) Comparación de tres alternativas para la administración de vacunas DTP, *Haemophilus influenzae* tipo b y hepatitis B a través del Programa Ampliado de Inmunización (PAI) en Bolivia. *Boletín Informativo del PAI* 26: 4-6.
  27. World Health Organization (1992) Informal discussion on quadrivalent diphtheria-tetanus-pertussis-hepatitis B vaccine. Final report. Geneva: World Health Organization.
  28. Santos JI, Levine O (2007) Vacunas combinadas para inmunización infantil. En: Andrus JK, de Quadros C, editores. *Avances Recientes en Inmunización*, 2da edición. Washington (D. C.): Organización Panamericana de la Salud. pp. 30-48.
  29. Hadler SC (1994) Cost benefit of combining antigens. *Biologicals* 22: 415-418.
  30. Di Fabio JL, de Quadros C (2001) Considerations for combination vaccine development and use in the developing world. *Clin Infect Dis* 33 (Suppl 4): S340-S345.
  31. Hay JW, Daum RS (1990) Cost-benefit analysis of *Haemophilus influenzae* type b prevention: Conjugate vaccination at eighteen months of age. *Pediatr Infect Dis J* 9: 246-252.
  32. Levine OS, Ortiz E, Contreras R, Lagos R, Vial P, et al. (1993) Cost-benefit analysis for the use of *Haemophilus influenzae* type b conjugate vaccine in Santiago, Chile. *Am J Epidemiol* 137: 1221-1228.
  33. Zhou F, Bisgard KM, Yusuf HR, Deuson RR, Bath SK, et al. (2002) Impact of universal *Haemophilus influenzae* type b vaccination starting at 2 months of age in the United States: An economic analysis. *Pediatrics* 110: 653-661.
  34. Andrus JK, Fitzsimmons J, de Quadros C (2006) Introducción de vacunas nuevas y subutilizadas: perspectivas de las Américas. En: Andrus JK, de Quadros C, editores. *Avances*

---

Recientes en Inmunización, 2da edición. Washington (D. C.): Organización Panamericana de la Salud. pp. 114-26.

35. Organización Panamericana de la Salud (2007) Informe Regional de SIREVA II: Datos por país y por grupos de edad sobre las características de los aislamientos de *Streptococcus pneumoniae*, *Haemophilus influenzae* y *Neisseria meningitidis*, en procesos invasores, 2000-2005. Washington (D. C.): Organización Panamericana de la Salud.
36. Vaccines and Immunization (2000) In the 42nd Meeting Pan American Directing Council, Washington DC, Sep 2000. Resolution CD42/R8. Pan American Health Organization. Available: [http://www.paho.org/english/gov/cd/cd42\\_fr-e.pdf](http://www.paho.org/english/gov/cd/cd42_fr-e.pdf). Accessed 6 March 2008.
37. Andrus JK, Tambini G, di Fabio JL, Periago MR (2004) Anticipating new vaccines in the Americas. Rev Panam Salud Publica 16: 369-370.
38. Pan American Health Organization (2006) Regional strategy for sustaining National Immunization Programs in the Americas. Working document presented at the 138th Executive Committee. Available: <http://www.paho.org/English/GOV/CE/ce138-11-e.pdf>. Accessed 6 March 2008.
39. Andrus JK, Toscano C, Lewis M, Oliveira L, Roper AM, et al. (2007) A model for enhancing evidence-based capacity to make informed policy decisions on the introduction of new vaccines in the Americas: PAHO's PROVAC initiative. Public Health Rep 122: 811-816.
40. Ribeiro GS, Lima JB, Reis JN, Gouveia EL, Cordeiro SM, et al. (2007) *Haemophilus influenzae* meningitis 5 years after introduction of the *Haemophilus influenzae* type b conjugate vaccine in Brazil. Vaccine 25: 4420-4428.
41. Lagos R, Horwitz I, Toro J, San Martin O, Abrego P, et al. (1996) Large scale, postlicensure,

- 
- selective vaccination of Chilean infants with PRP-T conjugate vaccine: Practicality and effectiveness in preventing invasive *Haemophilus influenzae* type b infections. *Pediatr Infect Dis J* 15: 216-222.
42. Levine OS, Lagos R, Munoz A, Villaroel J, Alvarez AM, et al. (1999) Defining the burden of pneumonia in children preventable by vaccination against *Haemophilus influenzae* type b. *Pediatr Infect Dis J* 18: 1060-1064.
43. de Andrade AL, de Andrade JG, Martelli CM, de Silva SA, de Oliveira RM, et al. (2004) Effectiveness of *Haemophilus influenzae* b conjugate vaccine on childhood pneumonia: A case-control study in Brazil. *Int J Epidemiol* 33: 173-181.
44. de la Hoz F, Higuera AB, Di Fabio JL, Luna M, Naranjo AG, et al. (2004) Effectiveness of *Haemophilus influenzae* type b vaccination against bacterial pneumonia in Colombia. *Vaccine* 23: 36-42.
45. World Health Organization (1996) Generic protocol for population-based surveillance of *Haemophilus influenzae* type b. Available: <http://www.who.int/vaccines-documents/DocsPDF/www9723.pdf>. Accessed 6 March 2008.
46. Organización Panamericana de la Salud (1998) Reunión en Centro América inicia sistema para la vigilancia de Hib y *Streptococcus pneumoniae*. *Boletín Informativo del PAI* 20: 4.
47. Kelly DF, Moxon ER, Pollard AJ (2004) *Haemophilus influenzae* type b conjugate vaccines. *Immunology* 113: 163-174.
48. Public Health Agency of Canada (2006) Invasive *Haemophilus influenzae* disease in Manitoba in the post-vaccination era suggests a changing epidemiology. *Can Commun Dis Rep* 32: 125-130.
49. McVernon J, Andrews N, Slack MP, Ramsay ME (2003) Risk of vaccine failure after

---

*Haemophilus influenzae* type b (Hib) combination vaccines with acellular pertussis. Lancet 361: 1521-1523.

50. Heath PT, Ramsay ME (2003) *Haemophilus influenzae* type b vaccine—Booster campaign. BMJ 326: 1158-1159.

51. Ramsay ME, McVernon J, Andrews NJ, Heath PT, Slack MP (2003) Estimating *Haemophilus influenzae* type b vaccine effectiveness in England and Wales by use of the screening method. J Infect Dis 188: 481-485.

52. Johnson NG, Ruggeberg JU, Balfour GF, Lee YC, Liddy H, et al. (2006) *Haemophilus influenzae* type b reemergence after combination immunization. Emerg Infect Dis 12: 937-941.

53. Howie SR, Antonio M, Akisanya A, Sambou S, Hakeem I, et al. (2007) Re-emergence of *Haemophilus influenzae* type b (Hib) disease in The Gambia following successful elimination with conjugate Hib vaccine. Vaccine 25: 6305-6309.

**Figura 1.** Coberturas con tercera dosis de vacunas contra *Haemophilus influenza* tipo *b* en niños menores de un año y número reportado de meningitis por Hib por año en (A) Chile (1996–2006), (B) Colombia (1997–2006) y (C) Uruguay (1990–2006)

Fuente: Informes de los países a la OPS y XVI Reunión de Grupo Técnico Asesor sobre enfermedades prevenibles por vacunación de la OPS, 2004. Colombia no reportó datos de meningitis para 2002 a la OPS y Uruguay reportó cero casos en 2006.

doi:10.1371/journal.pmed.0050087.g001

**Cuadro 1.** Vacunación contra Hib en las Américas, 1991–2007

| País/Territorio           | Año de introducción de vacuna contra Hib | Vacuna usada al introducir <sup>a</sup> | Vacuna usada en 2007 <sup>a</sup> | Esquema regular infantil 2007 |           |           |          |
|---------------------------|------------------------------------------|-----------------------------------------|-----------------------------------|-------------------------------|-----------|-----------|----------|
|                           |                                          |                                         |                                   | 1a Dosis                      | 2da Dosis | 3ra Dosis | Refuerzo |
| Anguilla                  | 1998                                     | Hib                                     | Pentavalente                      | 3 m                           | 5 m       | 7 m       |          |
| Antigua & Barbuda         | 2000                                     | Pentavalente                            | Pentavalente                      | 2 m                           | 4 m       | 6 m       |          |
| Argentina                 | 1997                                     | DTP-Hib                                 | DTP-Hib                           | 2 m                           | 4 m       | 6 m       | 18 m     |
| Bahamas <sup>b</sup>      | 1998                                     | Hib                                     | Pentavalente                      | 2 m                           | 4 m       | 6 m       |          |
|                           |                                          |                                         | DTP-Hib                           |                               |           |           | 15 m     |
| Barbados <sup>b</sup>     | 2000                                     | Pentavalente                            | Pentavalente                      | 3 m                           | 4.5 m     | 6 m       |          |
| Belize                    | 2001                                     | DTP-Hib                                 | Pentavalente                      | 2 m                           | 4 m       | 6 m       |          |
| Bermuda                   | 1989                                     | Hib                                     | DTaP-IPV-Hib                      | 2 m                           | 4 m       | 6 m       | 15-18 m  |
| Bolivia                   | 2000                                     | Pentavalente                            | Pentavalente                      | 2 m                           | 4 m       | 6 m       |          |
| Brasil                    | 1999                                     | Hib                                     | DTP-Hib                           | 2 m                           | 4 m       | 6 m       |          |
| Islas Vírgenes Británicas | 1999                                     | Hib                                     | Pentavalente                      | 2 m                           | 4 m       | 6 m       |          |
| Canadá <sup>c</sup>       | 1986                                     | Hib                                     | Hib or DTaP-IPV-Hib               | 2 m                           | 4 m       | 6 m       | 18 m     |
| Islas Caimán              | 1992                                     | Hib                                     | DTaP-IPV-Hib                      | 2 m                           | 4 m       | 6 m       |          |
|                           |                                          |                                         | DTaP-Hib                          |                               |           |           | 15 m     |
| Chile                     | 1996                                     | Hib/ DTP-Hib                            | Pentavalente                      | 2 m                           | 4 m       | 6 m       |          |
| Colombia                  | 1998                                     | Hib                                     | Pentavalente                      | 2 m                           | 4 m       | 6 m       |          |
| Costa Rica                | 1998                                     | Hib                                     | Pentavalente                      | 2 m                           |           | 6 m       |          |
|                           |                                          |                                         | Hib                               |                               | 4 m       |           | 15 m     |
| Cuba                      | 1999                                     | Hib                                     | Pentavalente                      | 2 m                           | 4 m       | 6 m       |          |
|                           |                                          |                                         | Hib                               |                               |           |           | 18 m     |
| Dominica <sup>d</sup>     | 2006                                     | Pentavalente                            | Pentavalente                      | 2 m                           | 4 m       | 6 m       |          |
| Rep. Dominicana           | 2001                                     | Pentavalente                            | Pentavalente                      | 2 m                           | 4 m       | 6 m       |          |



|                        |      |               |               |       |         |         |  |
|------------------------|------|---------------|---------------|-------|---------|---------|--|
|                        |      | e             | e             |       |         |         |  |
| Ecuador                | 2003 | Pentavalent e | Pentavalent e | 2 m   | 4 m     | 6 m     |  |
| El Salvador            | 2002 | Pentavalent e | Pentavalent e | 2 m   | 4 m     | 6 m     |  |
| Grenada                | 2000 | Pentavalent e | Pentavalent e | 6–8 s | 16–20 s | 24–28 s |  |
| Guatemala <sup>e</sup> | 2005 | Pentavalent e | Pentavalent e | 2 m   | 4 m     | 6 m     |  |
| Guyana                 | 2001 | Pentavalent e | Pentavalent e | 2 m   | 4 m     | 6 m     |  |

|                                    |                |               |               |     |       |       |      |
|------------------------------------|----------------|---------------|---------------|-----|-------|-------|------|
| Haiti                              | Not introduced |               |               |     |       |       |      |
| Honduras                           | 1999           | Hib           | Pentavalent e | 2 m | 4 m   | 6 m   |      |
| Jamaica                            | 2003           | Pentavalent e | Pentavalent e | 6 w | 3 m   | 5–6 m |      |
| México                             | 1998           | Pentavalent e | Pentavalent e | 2 m | 4 m   | 6 m   |      |
| Montserrat                         | 1999           | Hib           | Pentavalent e | 2 m | 4 m   | 6 m   |      |
| Nicaragua                          | 1999           | Pentavalent e | Pentavalent e | 2 m | 4 m   | 6 m   |      |
| Panamá                             | 2000           | Pentavalent e | Pentavalent e | 2 m | 4 m   | 6 m   |      |
|                                    |                |               | DTP-Hib       |     |       |       | 18 m |
| Paraguay                           | 2002           | Pentavalent e | Pentavalent e | 2 m | 4 m   | 6 m   |      |
| Perú <sup>f</sup>                  | 2005           | Pentavalent e | Pentavalent e | 2 m |       | 4 m   |      |
|                                    |                |               | Hib           |     | 3 m   |       |      |
| St. Kitts & Nevis                  | 2000           | Pentavalent e | Pentavalent e | 2 m | 4 m   | 6 m   |      |
| St. Lucia                          | 2002           | Pentavalent e | Pentavalent e | 3 m | 5 m   | 7 m   |      |
| St. Vincent & Grenadines           | 2003           | Pentavalent e | Pentavalent e | 2 m | 4 m   | 6 m   |      |
| Suriname                           | 2005           | Pentavalent e | Pentavalent e | 2 m | 4 m   | 6 m   |      |
| Trinidad & Tobago                  | 1999           | Hib           | Pentavalent e | 3 m | 4–5 m | 6 m   |      |
| Islas Turcas & Caicos <sup>g</sup> | 1999           | Hib           | Pentavalent e | 2 m | 4 m   | 6 m   |      |
| Uruguay                            | 1994           | Hib           | Pentavalent e | 2 m | 4 m   | 6 m   | 12 m |

|                             |      |     |                        |     |     |     |            |
|-----------------------------|------|-----|------------------------|-----|-----|-----|------------|
| Estados Unidos <sup>h</sup> | 1991 | Hib | Hib or combinatio<br>n | 2 m | 4 m | 6 m | 12–15<br>m |
| Venezuela                   | 2000 | Hib | Pentavalent<br>e       | 2 m | 4 m | 6 m |            |

Fuente: Informes de los países a la OPS, a menos que se indique otra cosa.

Los territorios que no reportan rutinariamente a la OPS—Guayana Francesa, Guadalupe, Martinique, Aruba, y las Antillas Holandesas—incluyen vacuna contra Hib en sus esquemas de vacunación infantil (no mostrados).

<sup>a</sup>Hib se refiere a la vacuna contra Hib monovalente; pentavalente a la combinación DTP-Hib-hepatitis B.

<sup>b</sup>Esquema obtenido de la OMS: WHO Vaccine-Preventable Diseases: Monitoring System. WHO, 2004.

<sup>c</sup>Vacuna polisacárida contra Hib para niños de  $\geq 24$  meses introducida en 1986. Vacuna conjugada contra Hib para lactantes introducida en 1992.

<sup>d</sup>El país compró vacuna pentavalente para su introducción a fines del año 2006.

<sup>e</sup>Vacuna pentavalente para beneficiarios del seguro social empezó a usarse en 1999 (*Instituto Guatemalteco del Seguro Social*). Se introdujo en 2005 para el resto del país.

<sup>f</sup>Comenzó a usar la vacuna contra Hib en ciertos sectores del país en 1997, pero se hizo parte del esquema nacional en 2005.

<sup>g</sup>El esquema cambió en 2006 de pentavalente a las 6, 12, y 18 semanas de edad.

<sup>h</sup>Combinaciones de vacuna DTaP-hepatitisB-IPV y Hib-hepatitisB pueden ser ofrecidas como alternativas. Esquema obtenido del sitio Web del CDC: <http://www.cdc.gov/nip/recs/child-schedule.htm>.

IPV, vacuna inactivada contra la polio; m, meses; s, semanas; a, años.
